# Supplementary material for: The PrEPARE Pretoria Project: protocol for a cluster-randomized factorial-design trial to prevent HIV with PrEP among adolescent girls and young women in Tshwane, South Africa
Source: Springer Nature journal article supplement (doi:10.1186/s12889-020-09458-y), 2020-09-15
Supplement: MOESM5 [file 18381820]

Supplementary Table. Estimated Detectable Differences in PrEP Uptake between AGYW in the PrEP/SRH+YWHC arm vs. PrEP/SRH only, controlling for intervention arm of clinic

| Proportion of AGYW who initiate PrEP in PrEP/SRH only Arm | Proportion of AGYW who initiate PrEP in PrEP/SRH+YWHC Arm | Difference |
|-----------------------------------------------------------|-----------------------------------------------------------|------------|
| 20%                                                       | 31%                                                       | 11%        |
| 30%                                                       | 42%                                                       | 12%        |
| 40%                                                       | 53%                                                       | 13%        |
| 50%                                                       | 63%                                                       | 13%        |
| 10%                                                       | 19%                                                       | 9%         |
