# Supplementary material for: The PrEPARE Pretoria Project: protocol for a cluster-randomized factorial-design trial to prevent HIV with PrEP among adolescent girls and young women in Tshwane, South Africa
Source: Springer Nature journal article supplement (doi:10.1186/s12889-020-09458-y), 2020-09-15
Supplement: MOESM7 [file 18381820]

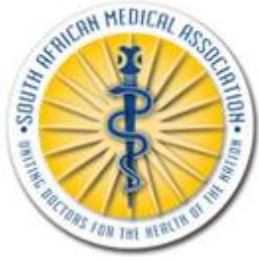

# THE SOUTH AFRICAN MEDICAL ASSOCIATION

Tel: +27 (0)12 481 2000 | Fax: +27 (0)12 481 2100 | [www.samedical.org](http://www.samedical.org)  
Block F | Castle Walk Office Park | Nossob Street | Erasmuskloof | Ext 3 | Pretoria | 0181  
PO Box 74789 | Lynnwood Ridge | 0040  
Reg No 1927/000136/08 | NPC

11 January 2019

RTI International  
3040 Cornwallis Road  
PO Box 12194  
Research Triangle Park  
NC 27709  
2194  
USA

Attention: Jackie Ndirangu  
[jndirangu@rti.org](mailto:jndirangu@rti.org)

Dear Jackie

## FINAL APPROVAL

|                         |                                                                                                   |
|-------------------------|---------------------------------------------------------------------------------------------------|
| <b>Protocol Number:</b> | <b>0216102</b>                                                                                    |
| <b>Protocol Title:</b>  | The PrEPARE Pretoria Project: Prevention, Empowering, and Protecting Young Women in South Africa. |

Your application dated 11 November 2018 for ethical evaluation of the abovementioned study was considered by the South African Medical Association Research Ethics Committee, at its meeting held on 28 November 2018.

The Ethics Committee is a registered IRB at the Office of Human Research Protection of the USA. Federal Wide Assurance was also received from the Office of Human Research Protection (Office of Human Research Protection –Group).

SAMAREC follows the standards adopted by the latest version of the American Food & Drug Administration (FDA) and ICH Harmonized Tripartite Guidelines for Good Clinical Practice; and conforms to the guidelines laid down by the World Medical Association, in particular, the Declaration of Helsinki (October 2013), the Belmont Report, the National Department of Health and the SA Medical Research Council.

The following members were present at the meeting:

|                                                          |                                             |
|----------------------------------------------------------|---------------------------------------------|
| Prof J R Snyman<br>MBChB, M Pharm Med, MD                | Male, Pharmacologist, SAMA Member           |
| Dr M Groenewald<br>MBChB, DCH (SA), PG Dip Int Res Ethic | Female, General Practitioner, SAMA Member   |
| Prof M Kakaza<br>MBChB, Mmed                             | Female, Specialist Neurologist, SAMA Member |
| Mrs B Fineberg                                           | Female, Educator                            |

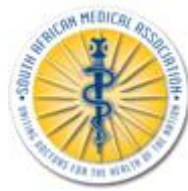

|                                                                    |                                                 |
|--------------------------------------------------------------------|-------------------------------------------------|
| BSc (Hons); H.D.E                                                  |                                                 |
| Ms U Behrtel<br>BLC.LLB,Cert MedLaw                                | Female, Attorney                                |
| Dr S Franszen<br>MBCH.B, M.Med (O & G) , ACAM (Chel), BA (Theo)    | Female, General Practitioner, SAMA Member       |
| Ms W Massangaie<br>LLB                                             | Female, Attorney                                |
| Mr M le Roux<br>B.Th, M.Div                                        | Male, Legal Secretary                           |
| Dr T Lengana<br>MBBCh, FCNP (SA), MSc Med (Bioethics & Health Law) | Male, Specialist Nuclear Physician, SAMA Member |

### Resolution

After noting and considering the input of the evaluators on the above-mentioned study, the committee **RESOLVED** that the application be **approved**.

#### 1. COVERING LETTER

The Covering Letter, dated 16 November 2018 was noted and accepted.

The request to include 16 year and older participants and the request to waiver Parentis Consent has been approved due to the following reasons:

- i) This specific study design is not invasive and merely a collection of data
- ii) The Benefit / Risk assessment clearly shows more benefit
- ii) Based on the South African Department of Health Ethics in Health Research Principles, Process and Structures (2015):

*"3.2.2.4 Minors' independent consent*

*In particular circumstances, e.g. for reasons of sensitivity, like discussion about sexual activities, substance abuse etc. it may be desirable and ethically justifiable for minors (especially older minors i.e. 16 years and older) to choose independently i.e. without parental assistance whether to participate in research. Generally, only minimal risk research is suitable for independent consent by minors. Reasons supporting the desirability of independent consent may include recruiting sufficient numbers of minors who otherwise would be unwilling to participate if they must tell their parents about the nature of the research in order to obtain parental permission."*

#### 2. ANNEXURE 1 - CLINIC AUDIT

Annexure 1 – The Clinic Audit was noted and approved.

#### 3. ANNEXURE 2 - CLINICAL PROVIDER QUESTIONNAIRE

Annexure 2 – The Clinical Provider Questionnaire was noted and approved.

#### 4. ANNEXURE 3 – SUPPORT STAFF QUESTIONNAIRE

Annexure 3 – The Support Staff Questionnaire was noted and approved.

#### 5. ANNEXURE 4a – CLINICAL STAFF CONSENT\_SD TRAINING

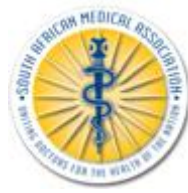

Annexure 4a – Clinical Staff Consent\_SD Training Version 12/12/2018 was noted and approved.

**6. ANNEXURE 4b - CLINIC STAFF CONSENT\_CONTROL**

Annexure 4b – Clinic Staff Consent\_Control Version 12/12/2018 was noted and approved.

**7. ANNEXURE 5a PREPAREPRETORIAMARKETINGFLYER\_REDUCED**

Annexure 5a – PrEParePretoriaMarketingFlyer\_Reduced was noted and approved.

**8. ANNEXURE 5b PREPAREPRETORIA MARKETINGCARD\_REDUCED**

Annexure 5b – PrEParePretoria-MarketingCard\_Reduced was noted and approved.

**9. ANNEXURE 6 PREPAREPRETORIABROCHURE\_REDUCED**

Annexure 6 – PrEParePretoriaBrochure\_Reduced was noted and approved.

**10. ANNEXURE 7.SCREENER**

Annexure 7 – The Screener was noted and approved.

**11. ANNEXURE 8. RELEASE FORM FOR MEDICAL RECORDS**

Annexure 8 – The Release Form for Medical Records was noted and approved.

**12. ANNEXURE 9 - CONSENT FOR HIV AND PREGNANCY VERIFICATION TESTING**

Annexure 9 – Consent for HIV and Pregnancy Verification Testing Version 12/12/ 2018 was noted and approved.

**13. ANNEXURE 10 - BIOLOGICAL\_VERIFICATION OF ELIGIBILITY**

Annexure 10 – The Biological\_Verification of Eligibility was noted and approved.

**14. ANNEXURE 11 - APPOINTMENT CARD**

Annexure 11 – The Appointment Card was noted and approved.

**15. ANNEXURE 12 - AGYW CONSENT-ASSENT**

Annexure 12 – AGYW Consent Assent Version 17 December 2018 was noted and approved.

**16. ANNEXURE 13 - CONSENT CHECKLIST\_CLINICIAN**

Annexure 13 – Consent Checklist\_Clinician was noted and approved.

**17. ANNEXURE 14 - PARENTAL OR IN LOCO PARENTIS CONSENT**



The request for Parental or in Loco Parentis Consent is waived – kindly see rationale under 1. Covering Letter.

**18. ANNEXURE 15 - PARENTAL OR IN LOCO PARENTIS CONFIDENTIALITY AGREEMENT FORM**

The request for Parental or in Loco parentis Consent is waived – kindly see rationale under 1. Covering Letter.

**19. ANNEXURE 16 - WORKSHEET D FOR RESEARCH WITH CHILDREN**

Annexure 16 – The Worksheet D for Research with Children was noted and approved.

**20. ANNEXURE 17 - RIGHTS OF RESEARCH PARTICIPANTS**

Annexure 17 – The Rights of Research Participants was noted and approved.

**21. ANNEXURE 18 – LOCATOR FORM**

Annexure 18 – The Locator Form was noted and approved.

**22. ANNEXURE 19 - PREPARE BASELINE QUESTIONNAIRE\_NOV 15 2018**

Annexure 19 – PrEPARE Baseline Questionnaire\_Nov 15 2018 was noted and approved.

**23. ANNEXURE 20 - BIOLOGICAL FORM**

Annexure 20 – The Biological Form was noted and approved.

**24. ANNEXURE 21 - PARTICIPANT SATISFACTION FORM**

Annexure 21 – The Participant Satisfaction Form was noted and approved.

**25. ANNEXURE 22 - REFERRAL FORM**

Annexure 22 – The Referral Form was noted and approved.

**26. ANNEXURE 23 - RESOURCE GUIDE**

Annexure 23 – The Resource Guide was noted and approved.

**27. ANNEXURE 24. STAFF CONFIDENTIALITY**

Annexure 24 – The Staff Confidentiality was noted and approved.

**28. ANNEXURE 25 - PROCEDURES FOR HANDLING DISTRESSED PARTICIPANTS**

Annexure 25 – The Procedures for Handling Distressed Participants was noted and approved.

**29. ANNEXURE 26. INCIDENT REPORT**



Annexure 26 – The Incident Report was noted and approved.

### 30. CURRICULUM VITAE OF PRINCIPAL INVESTIGATORS AND OTHER STUDY STAFF

The Committee noted the Investigators CVs, declarations and other relevant documentation and RESOLVED as follows:

| Site Address                                                                          | Investigator                                     | CV, Declaration and other supporting documents | Status    |
|---------------------------------------------------------------------------------------|--------------------------------------------------|------------------------------------------------|-----------|
| <b>Research Triangle Park<br/>3040 East Cornwallis<br/>Road<br/>NC<br/>27709-2194</b> | <b>Dr W Wechsberg<br/>Principal Investigator</b> | Noted and accepted.                            | Approved. |
|                                                                                       | <b>Dr A Minnis<br/>Sub Investigator</b>          | Noted and accepted.                            | Approved. |
|                                                                                       | <b>Dr L Nyblade<br/>Sub-Investigator</b>         | Noted and accepted.                            | Approved. |
|                                                                                       | <b>Dr F Browne<br/>Sub-Investigator</b>          | Noted and accepted.                            | Approved. |
|                                                                                       | <b>Dr I Speizer<br/>Sub-Investigator</b>         | Noted and accepted.                            | Approved. |
|                                                                                       | <b>Dr K Ahmed<br/>Sub-Investigator</b>           | Noted and accepted.                            | Approved. |
|                                                                                       | <b>Dr B Myers<br/>Sub-Investigator</b>           | Noted and accepted.                            | Approved. |
|                                                                                       | <b>Dr C Bonner<br/>Sub Investigator</b>          | Noted and accepted.                            | Approved. |
|                                                                                       | <b>Ms J Ndirangu<br/>Project Director</b>        | Noted and accepted.                            | Approved. |

- *Kindly take note that all health professionals who dispense medicines are required to have a dispensing licence, unless a pharmacist is on site to dispense such medicines. In addition, medical practitioners with dispensing licenses are only permitted (legally) to dispense on their own prescriptions*
- *Kindly ensure that GCP Training is renewed in due course*
- *Take note that Pharmacists dispensing medicines require Malpractice Insurance*
- *Kindly ensure that expired registrations with Statutory Councils must be updated/renewed as appropriate*
- *Clinical trial information on CV's should have the names-of sponsors, abbreviated titles and protocol numbers of all studies listed.*
- *Kindly take note that all registered nurses who will be performing duties which fall within the scope of the nursing profession, are required to hold professional indemnity insurance in their personal capacities, unless their professional actions will be indemnified / covered by the insurance held by the sponsor. The onus is on the sponsor to ensure that the necessary and adequate insurance and professional indemnity coverage is in place, before commencement of the study.*

### 31. SAMAREC PROTOCOL\_11.15

The SAMAREC Protocol\_11.15 was noted and approved.

Yours Sincerely

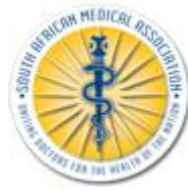

*Adri van der Walt*

Adri van der Walt  
SAMAREC Officer  
SA Medical Association  
Tel: (012) 481 2046  
[samarec@samedical.org](mailto:samarec@samedical.org)

## IRB Authorization Agreement

Name of Research Project: The PREPaRE Project: PRevention, Empowering and PRotecting Young Women in South Africa

Principal Investigator(s): Wendee Wechsberg

IRB Protocol Number or Project Number: SAMAREC: 0216102     RTI: 14142

Sponsor or Funding Agency: NICHD

Award Number, if any: 1R01HD094629.01

Name of Institution Providing IRB Review (Institution A): The South African Medical Association

OHRP Assurance Number (MPA or FWA): FWA00027240

IRB Registration Number: IRB00011624

Name of Institution Relying Upon IRB Review Above (Institution B): RTI International

OHRP Assurance Number (MPA or FWA): FWA00003331

IRB Registration Numbers: IRB00000653, IRB00000655

The Officials signing below agree that Institution B may rely on the above IRB review, approval, and continuing oversight provided under Institution A's Assurance for the above named research study.

The review, approval, and continuing oversight performed by the IRB satisfy the requirements of the HHS regulations for the protection of human subjects at 45 CFR 46, as well as the requirements of Institution A's OHRP-approved Assurance.

Institution A will supply relevant minutes of IRB, copies of IRB review approvals, including initial reviews, any amendments and continuing reviews to Institution B upon request. In addition, Institution A will notify Institution B of any complaints, adverse events, serious adverse events and/or unanticipated problems involving risks to subjects or others. Also, Institution A will notify Institution B about any serious or continuing noncompliance in regard to this study, any reports made to the DHHS Office for Human Research Protection (OHRP), any suspension or termination of IRB approval; or any other important findings that affect the IRB approval of this research study. Institution B remains responsible for ensuring compliance with the IRB's determinations and with the terms of its OHRP-approved Assurance. Either institution may terminate this agreement at any time by providing written notice.

This document should be kept on file at both institutions and must be provided to OHRP upon request.

Signatures:

Authorized Official of Institution "A"

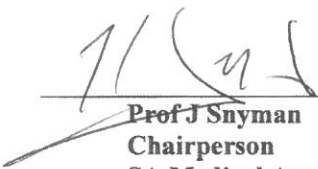  
\_\_\_\_\_  
**Prof J Snyman**  
**Chairperson**  
**SA Medical Association**

8 March 2019  
\_\_\_\_\_  
**Date**

Authorized Official of Institution "B"

  
\_\_\_\_\_  
**Juesta Caddell, Ph. D.**  
**IRB Director**  
**Office of Research Protection**  
**RTI International**

03/06/2019  
\_\_\_\_\_  
**Date**



# THE SOUTH AFRICAN MEDICAL ASSOCIATION

Tel: +27 (0)12 481 2000 | Fax: +27 (0)12 481 2100 | [www.samedical.org](http://www.samedical.org)  
Block F | Castle Walk Office Park | Nossob Street | Erasmuskloof | Ext 3 | Pretoria | 0181  
PO Box 74789 | Lynnwood Ridge | 0040  
Reg No 1927/000136/08 | NPC

14 March 2019

RTI International  
3040 Cornwallis Road  
PO Box 12194  
Research Triangle Park  
NC 27709  
2194  
USA

Attention: Jackie Ndirangu  
[jindirangu@rti.org](mailto:jindirangu@rti.org)

Dear Jackie

## AMENDMENT 1

|                         |                                                                                                   |
|-------------------------|---------------------------------------------------------------------------------------------------|
| <b>Protocol Number:</b> | <b>0216102</b>                                                                                    |
| <b>Protocol Title:</b>  | The PrEPARE Pretoria Project: Prevention, Empowering, and Protecting Young Women in South Africa. |

Your letter dated 28 February 2019 refers.

The Committee Member noted and approved the following received documentation:

- Annexure 1\_Clinical Audit Form Final
- Annexure 4a\_Clinic Staff SD\_Participant Information and informed Consent Document.2.27.bnh
- Annexure 4b\_Clinic Staff Control\_Participant information and Informed Consent Document Consent.2.27.bnh
- Annexure 7\_ Quick Field Screener Final
- Annexure 9\_Consent for HIV and Pregnancy Status Verification Testing 2.27.bnh
- Annexure 10\_Biological Verification of Eligibility 2.27.bnh
- Annexure 12\_Participant Information Informed Consent Assent Document 2.27.bnh
- Annexure 14\_Mother.In Loco Parentis Informed Consent document Final
- Annexure 15\_Mother or In Loco Parentis Confidentiality Agreement Form
- Annexure 19\_Baseline Questionnaire Final
- Annexure 20\_Biological Form Final
- Annexure 22\_Referral Form Final
- Annexure 25\_Procedures for Making Referrals for Distressed Respondents2.27.bnh
- SAMAREC Revised Protocol\_Deferment 2.28

Yours Sincerely





*Adri van der Walt*

Adri van der Walt  
SAMAREC Officer  
SA Medical Association  
Tel: (012) 481 2046  
[samarec@samedical.org](mailto:samarec@samedical.org)

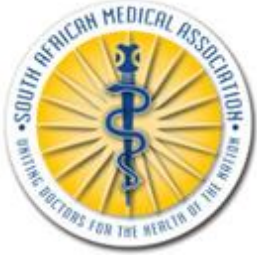

# THE SOUTH AFRICAN MEDICAL ASSOCIATION

Tel: +27 (0)12 481 2000 | Fax: +27 (0)12 481 2100 | [www.samedical.org](http://www.samedical.org)  
Block F | Castle Walk Office Park | Nossob Street | Erasmuskloof | Ext 3 | Pretoria | 0181  
PO Box 74789 | Lynnwood Ridge | 0040  
Reg No 1927/000136/08 | NPC

01 April 2019

RTI International  
3040 Cornwallis Road  
PO Box 12194  
Research Triangle Park  
NC 27709  
2194  
USA

Attention: Jackie Ndirangu  
[jndirangu@rti.org](mailto:jndirangu@rti.org)

Dear Jackie

## AMENDMENT 2

|                         |                                                                                                   |
|-------------------------|---------------------------------------------------------------------------------------------------|
| <b>Protocol Number:</b> | <b>0216102</b>                                                                                    |
| <b>Protocol Title:</b>  | The PrEPARE Pretoria Project: Prevention, Empowering, and Protecting Young Women in South Africa. |

Your letter dated 18 March 2019 refers.

The Committee Member noted and approved the following received documentation:

- Annexure 8 – Release Form for Medical Records 3.18.19
- Annexure 12\_Participant information Informed Consent Assent Document 3.18.19
- Annexure 14\_Mother.In Loco Parentis Informed Consent Document 3.18.19
- Modification for PrEP 3.18.19

Yours Sincerely

Adri van der Walt  
SAMAREC Officer  
SA Medical Association  
Tel: (012) 481 2046  
[samarec@samedical.org](mailto:samarec@samedical.org)

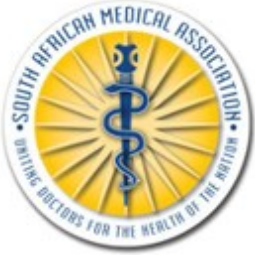

# THE SOUTH AFRICAN MEDICAL ASSOCIATION

Tel: +27 (0)12 481 2000 | Fax: +27 (0)12 481 2100 | [www.samedical.org](http://www.samedical.org)  
Block F | Castle Walk Office Park | Nossob Street | Erasmuskloof | Ext 3 | Pretoria | 0181  
PO Box 74789 | Lynnwood Ridge | 0040  
Reg No 1927/000136/08 | NPC

04 July 2019

RTI International  
3040 Cornwallis Road  
PO Box 12194  
Research Triangle Park  
NC 27709  
2194  
USA

Attention: Jackie Ndirangu  
[jndirangu@rti.org](mailto:jndirangu@rti.org)

Dear Jackie

## FOLLOW UP APPOINTMENT DOCUMENTS

|                         |                                                                                                   |
|-------------------------|---------------------------------------------------------------------------------------------------|
| <b>Protocol Number:</b> | <b>0216102</b>                                                                                    |
| <b>Protocol Title:</b>  | The PrEPARE Pretoria Project: Prevention, Empowering, and Protecting Young Women in South Africa. |

Your letter dated 26 June 2019 refers.

The Committee Member noted and approved the following documents:

- Annexure 1 – Participant Information Informed Consent Assent Document – Follow-up
- Annexure 2 - Clinic Staff Participant Information And Informed Consent Document Follow-up
- Annexure 3 – Participant Follow-up Questionnaire

Yours Sincerely

Adri van der Walt  
SAMAREC Officer  
SA Medical Association  
Tel: (012) 481 2046  
[samarec@samedical.org](mailto:samarec@samedical.org)

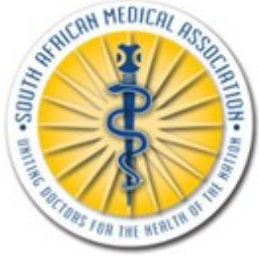

# THE SOUTH AFRICAN MEDICAL ASSOCIATION

Tel: +27 (0)12 481 2000 | Fax: +27 (0)12 481 2100 | [www.samedical.org](http://www.samedical.org)  
Block F | Castle Walk Office Park | Nossob Street | Erasmuskloof | Ext 3 | Pretoria | 0181  
PO Box 74789 | Lynnwood Ridge | 0040  
Reg No 1927/000136/08 | NPC

28 October 2019

RTI International  
3040 Cornwallis Road  
PO Box 12194  
Research Triangle Park  
NC 27709-2194  
USA

Attention: Jackie Ndirangu  
[jndirangu@rti.org](mailto:jndirangu@rti.org)

Dear Jackie

## STUDY FORM MODIFICATION

|                         |                                                                                         |
|-------------------------|-----------------------------------------------------------------------------------------|
| <b>Protocol Number:</b> | <b>0216102</b>                                                                          |
| <b>Protocol Title:</b>  | The PREPaRE Project: Prevention, Empowering, and ProtEcting Young Women in South Africa |

Your letter dated 08 October 2019 refers.

The Committee Member noted and approved the following received document:

- Annexure 7 \_ Quick Field Screener\_10.07.19

Yours Sincerely

Adri van der Walt  
SAMAREC Officer  
SA Medical Association  
Tel: (012) 481 2046  
[samarec@samedical.org](mailto:samarec@samedical.org)



# THE SOUTH AFRICAN MEDICAL ASSOCIATION

Tel: +27 (0)12 481 2000 | Fax: +27 (0)12 481 2100 | [www.samedical.org](http://www.samedical.org)  
Block F | Castle Walk Office Park | Nossob Street | Erasmuskloof | Ext 3 | Pretoria | 0181  
PO Box 74789 | Lynnwood Ridge | 0040  
Reg No 1927/000136/08 | NPC

29 November 2019

RTI International  
3040 Cornwallis Road  
PO Box 12194  
Research Triangle Park  
NC 27709-2194  
USA

Attention: Jackie Ndirangu  
[indirangu@rti.org](mailto:indirangu@rti.org)

Dear Jackie

## MINOR AMENDMENT NOVEMBER 2019

|                         |                                                                                         |
|-------------------------|-----------------------------------------------------------------------------------------|
| <b>Protocol Number:</b> | <b>0216102</b>                                                                          |
| <b>Protocol Title:</b>  | The PREPaRE Project: Prevention, Empowering, and ProtEcting Young Women in South Africa |

### Resolution

After noting and considering the input of the evaluators on the above-mentioned study, the committee **RESOLVED** that the application be **approved**.

- 1. COVERING LETTER, dated 21 November 2019**  
The Covering Letter, dated 21 November 2019 was noted and accepted.
- 2. CLINIC STAFF CONTROL\_PARTICIPANT INFORMATION AND INFORMED CONSENT DOCUMENT CONSENT\_REVISIED 11/21/19**  
The Clinic Staff Control\_Participant Information and Informed Consent Document Consent\_Revised 11.21.19 was noted and approved.
- 3. CLINIC STAFF SD\_PARTICIPANT INFORMATION AND INFORMED CONSENT DOCUMENT\_REVISIED 11.21.2019**  
The Clinic Staff SD\_Participant Information and Informed Consent Document\_Revised 11/21/2019 was noted and approved.
- 4. CLINIC STAFF \_ PARTICIPANT INFORMATION AND INFORMED CONSENT DOCUMENT – FOLLOW UP \_ REVISIED \_ 11/21/19**  
The Clinic Staff \_ Participant Information and Informed Consent Document- follow up \_ Revised \_ 11/21/19 was noted and approved.
- 5. PROTOCOL MODIFICATION FOR SURVEY\_FINAL 11.21.19**  
The Protocol Modification for Survey\_Final 11.21.19 was noted and approved.

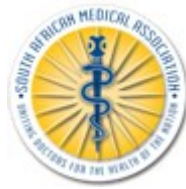

Yours Sincerely

*A. van der Walt*

Adri van der Walt  
SAMAREC Officer  
SA Medical Association  
Tel: (012) 481 2046  
[samarec@samedical.org](mailto:samarec@samedical.org)

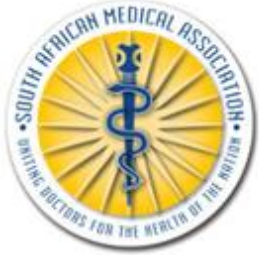

# THE SOUTH AFRICAN MEDICAL ASSOCIATION

Tel: +27 (0)12 481 2000 | Fax: +27 (0)12 481 2100 | [www.samedical.org](http://www.samedical.org)  
Block F | Castle Walk Office Park | Nossob Street | Erasmuskloof | Ext 3 | Pretoria | 0181  
PO Box 74789 | Lynnwood Ridge | 0040  
Reg No 1927/000136/08 | NPC

05 February 2020

RTI International  
3040 Cornwallis Road  
PO Box 12194  
Research Triangle Park  
NC 27709-2194  
USA

Attention: Jackie Ndirangu  
[indirangu@rti.org](mailto:indirangu@rti.org)

Dear Jackie

## MINOR AMENDMENT January 2020

|                         |                                                                                               |
|-------------------------|-----------------------------------------------------------------------------------------------|
| <b>Protocol Number:</b> | <b>0216102</b>                                                                                |
| <b>Protocol Title:</b>  | PrEPARE Pretoria Project: Prevention, Empowering, and Protecting Young Women in South Africa. |

Your letter dated 09 January 2020 refers.

The Committee Member noted and approved the following documents:

- Annexure 27 Consent for Co-enrolment Check\_12.02.19
- Annexure 28 Co-enrolment Check List & Entry Form\_01.08.20
- Revised Protocol\_01.08.20
- Annexure 2c \_ Participant Information Informed Consent Assent Document – 9m follow up \_ 01.09.20

Yours Sincerely

Adri van der Walt  
SAMAREC Officer  
SA Medical Association  
Tel: (012) 481 2046  
[samarec@samedical.org](mailto:samarec@samedical.org)



# THE SOUTH AFRICAN MEDICAL ASSOCIATION

Tel: +27 (0)12 481 2000 | Fax: +27 (0)12 481 2100 | [www.samedical.org](http://www.samedical.org)  
Block F | Castle Walk Office Park | Nossob Street | Erasmuskloof | Ext 3 | Pretoria | 0181  
PO Box 74789 | Lynnwood Ridge | 0040  
Reg No 1927/000136/08 | NPC

30 March 2020

RTI International  
3040 Cornwallis Road  
PO Box 12194  
Research Triangle Park  
NC 27709-2194  
USA

Attention: Jackie Ndirangu  
[jndirangu@rti.org](mailto:jndirangu@rti.org)

Dear Jackie

## STUDY ACTIVITIES MODIFICATION

|                         |                                                                                         |
|-------------------------|-----------------------------------------------------------------------------------------|
| <b>Protocol Number:</b> | <b>0216102</b>                                                                          |
| <b>Protocol Title:</b>  | The PREPaRE Project: Prevention, Empowering, and ProtEcting Young Women in South Africa |

Your letter dated 20 March 2020 refers.

The Committee Member noted the modification to study activities due to the unprecedented COVID-19 pandemic.

Yours Sincerely

Adri van der Walt  
SAMAREC Officer  
SA Medical Association  
Tel: (012) 481 2046  
[samarec@samedical.org](mailto:samarec@samedical.org)





# THE SOUTH AFRICAN MEDICAL ASSOCIATION

Tel: +27 (0)12 481 2000 | Fax: +27 (0)12 481 2100 | [www.samedical.org](http://www.samedical.org)  
Block F | Castle Walk Office Park | Nossob Street | Erasmuskloof | Ext 3 | Pretoria | 0181  
PO Box 74789 | Lynnwood Ridge | 0040  
Reg No 1927/000136/08 | NPC

10 April 2020

RTI International  
3040 Cornwallis Road  
PO Box 12194  
Research Triangle Park  
NC 27709  
2194  
USA

Attention: Jackie Ndirangu  
[jndirangu@rti.org](mailto:jndirangu@rti.org)

Dear Jackie

## FOLLOW UP APPOINTMENT DOCUMENTS

|                         |                                                                                                   |
|-------------------------|---------------------------------------------------------------------------------------------------|
| <b>Protocol Number:</b> | <b>0216102</b>                                                                                    |
| <b>Protocol Title:</b>  | The PrEPARE Pretoria Project: Prevention, Empowering, and Protecting Young Women in South Africa. |

Your letter dated 31 March 2020 refers.

The Committee Member noted and approved the following documents:

- Annexure 1 – Support Staff Questionnaire\_FU\_03.31.20\_Final
- Annexure 2 - Support Staff Questionnaire\_SD FU\_03.31.20\_Final
- Annexure 3 – Support Staff Questionnaire\_SD FU\_03.31.20
- Annexure 4 – Clinical Staff Questionnaire\_ FU 03.31.20\_Final
- Annexure 5 – Clinical Staff Questionnaire\_SD FU 03.31.20\_Final
- Revised Protocol\_Final 02.25.20

Yours Sincerely

Adri van der Walt  
SAMAREC Officer  
SA Medical Association  
Tel: (012) 481 2046  
[samarec@samedical.org](mailto:samarec@samedical.org)

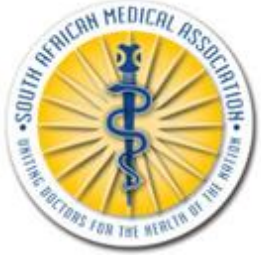

# THE SOUTH AFRICAN MEDICAL ASSOCIATION

Tel: +27 (0)12 481 2000 | Fax: +27 (0)12 481 2100 | [www.samedical.org](http://www.samedical.org)  
Block F | Castle Walk Office Park | Nossob Street | Erasmuskloof | Ext 3 | Pretoria | 0181  
PO Box 74789 | Lynnwood Ridge | 0040  
Reg No 1927/000136/08 | NPC

28 April 2020

RTI International  
3040 Cornwallis Road  
PO Box 12194  
Research Triangle Park  
NC 27709-2194  
USA

Attention: Jackie Ndirangu  
[jndirangu@rti.org](mailto:jndirangu@rti.org)

Dear Jackie

## STUDY ACTIVITIES MODIFICATION

|                         |                                                                                         |
|-------------------------|-----------------------------------------------------------------------------------------|
| <b>Protocol Number:</b> | <b>0216102</b>                                                                          |
| <b>Protocol Title:</b>  | The PREPaRE Project: Prevention, Empowering, and ProtEcting Young Women in South Africa |

Your letter dated 22 April 2020 refers.

The Committee Member noted the modification to study activities due to the unprecedented COVID-19 pandemic.

Yours Sincerely

Adri van der Walt  
SAMAREC Officer  
SA Medical Association  
Tel: (012) 481 2046  
[samarec@samedical.org](mailto:samarec@samedical.org)



# THE SOUTH AFRICAN MEDICAL ASSOCIATION

Tel: +27 (0)12 481 2000 | Fax: +27 (0)12 481 2100 | [www.samedical.org](http://www.samedical.org)  
Block F | Castle Walk Office Park | Nossob Street | Erasmuskloof | Ext 3 | Pretoria | 0181  
PO Box 74789 | Lynnwood Ridge | 0040  
Reg No 1927/000136/08 | NPC

28 April 2020

RTI International  
3040 Cornwallis Road  
PO Box 12194  
Research Triangle Park  
NC 27709-2194  
USA

Attention: Jackie Ndirangu  
[jindirangu@rti.org](mailto:jindirangu@rti.org)

Dear Jackie

## MINOR AMENDMENT COVID-19

|                         |                                                                                         |
|-------------------------|-----------------------------------------------------------------------------------------|
| <b>Protocol Number:</b> | <b>0216102</b>                                                                          |
| <b>Protocol Title:</b>  | The PREPaRE Project: Prevention, Empowering, and ProtEcting Young Women in South Africa |

### Resolution

After noting and considering the input of the evaluators on the above-mentioned study, the committee **RESOLVED** that the application be **approved**.

- 1. COVERING LETTER, dated 23 April 2020**  
The Covering Letter, dated 23 April 2020 was noted and accepted.
- 2. PREPaRE COVID QUESTIONNAIRE**  
The PREPaRE COVID Questionnaire dated 23 April 2020 was noted and approved.

Yours Sincerely

Adri van der Walt  
SAMAREC Officer  
SA Medical Association  
Tel: (012) 481 2046  
[samarec@samedical.org](mailto:samarec@samedical.org)
